# Supplementary material
Source: publisher figshare collection journal article supplement (https://gsajournals.figshare.com/ndownloader/files/22924052)
Supplement: Supplementary file 1 [file 22924052]

id	mouse	pop	sub	allele
1	C1_01_GT	0	1	1
2	C1_01_GT	0	1	2
3	C1_02_GT	0	1	1
4	C1_02_GT	0	1	2
5	C1_03_GT	0	1	1
6	C1_03_GT	0	1	2
7	C1_04_GT	0	1	1
8	C1_04_GT	0	1	2
9	C1_05_GT	0	1	1
10	C1_05_GT	0	1	2
11	C1_06_GT	0	1	1
12	C1_06_GT	0	1	2
13	C1_07_GT	0	1	1
14	C1_07_GT	0	1	2
15	C1_08_GT	0	1	1
16	C1_08_GT	0	1	2
17	C1_09_GT	0	1	1
18	C1_09_GT	0	1	2
19	C1_10_GT	0	1	1
20	C1_10_GT	0	1	2
21	C2_11_GT	0	2	1
22	C2_11_GT	0	2	2
23	C2_12_GT	0	2	1
24	C2_12_GT	0	2	2
25	C2_13_GT	0	2	1
26	C2_13_GT	0	2	2
27	C2_14_GT	0	2	1
28	C2_14_GT	0	2	2
29	C2_15_GT	0	2	1
30	C2_15_GT	0	2	2
31	C2_16_GT	0	2	1
32	C2_16_GT	0	2	2
33	C2_17_GT	0	2	1
34	C2_17_GT	0	2	2
35	C2_18_GT	0	2	1
36	C2_18_GT	0	2	2
37	C2_19_GT	0	2	1
38	C2_19_GT	0	2	2
39	C2_80_GT	0	2	1
40	C2_80_GT	0	2	2
41	C4_20_GT	0	4	1
42	C4_20_GT	0	4	2
43	C4_21_GT	0	4	1
44	C4_21_GT	0	4	2
45	C4_22_GT	0	4	1
46	C4_22_GT	0	4	2
47	C4_23_GT	0	4	1
48	C4_23_GT	0	4	2
49	C4_24_GT	0	4	1
50	C4_24_GT	0	4	2
51	C4_25_GT	0	4	1
52	C4_25_GT	0	4	2
53	C4_26_GT	0	4	1
54	C4_26_GT	0	4	2
55	C4_27_GT	0	4	1
56	C4_27_GT	0	4	2
57	C4_28_GT	0	4	1
58	C4_28_GT	0	4	2
59	C4_29_GT	0	4	1
60	C4_29_GT	0	4	2
61	C5_30_GT	0	5	1
62	C5_30_GT	0	5	2
63	C5_31_GT	0	5	1
64	C5_31_GT	0	5	2
65	C5_32_GT	0	5	1
66	C5_32_GT	0	5	2
67	C5_33_GT	0	5	1
68	C5_33_GT	0	5	2
69	C5_34_GT	0	5	1
70	C5_34_GT	0	5	2
71	C5_35_GT	0	5	1
72	C5_35_GT	0	5	2
73	C5_36_GT	0	5	1
74	C5_36_GT	0	5	2
75	C5_37_GT	0	5	1
76	C5_37_GT	0	5	2
77	C5_38_GT	0	5	1
78	C5_38_GT	0	5	2
79	C5_39_GT	0	5	1
80	C5_39_GT	0	5	2
81	H3_40_GT	1	3	1
82	H3_40_GT	1	3	2
83	H3_41_GT	1	3	1
84	H3_41_GT	1	3	2
85	H3_42_GT	1	3	1
86	H3_42_GT	1	3	2
87	H3_43_GT	1	3	1
88	H3_43_GT	1	3	2
89	H3_44_GT	1	3	1
90	H3_44_GT	1	3	2
91	H3_45_GT	1	3	1
92	H3_45_GT	1	3	2
93	H3_46_GT	1	3	1
94	H3_46_GT	1	3	2
95	H3_47_GT	1	3	1
96	H3_47_GT	1	3	2
97	H3_77_GT	1	3	1
98	H3_77_GT	1	3	2
99	H6_49_GT	1	6	1
100	H6_49_GT	1	6	2
101	H6_50_GT	1	6	1
102	H6_50_GT	1	6	2
103	H6_51_GT	1	6	1
104	H6_51_GT	1	6	2
105	H6_52_GT	1	6	1
106	H6_52_GT	1	6	2
107	H6_53_GT	1	6	1
108	H6_53_GT	1	6	2
109	H6_54_GT	1	6	1
110	H6_54_GT	1	6	2
111	H6_55_GT	1	6	1
112	H6_55_GT	1	6	2
113	H6_56_GT	1	6	1
114	H6_56_GT	1	6	2
115	H6_57_GT	1	6	1
116	H6_57_GT	1	6	2
117	H6_78_GT	1	6	1
118	H6_78_GT	1	6	2
119	H7_58_GT	1	7	1
120	H7_58_GT	1	7	2
121	H7_59_GT	1	7	1
122	H7_59_GT	1	7	2
123	H7_60_GT	1	7	1
124	H7_60_GT	1	7	2
125	H7_61_GT	1	7	1
126	H7_61_GT	1	7	2
127	H7_62_GT	1	7	1
128	H7_62_GT	1	7	2
129	H7_63_GT	1	7	1
130	H7_63_GT	1	7	2
131	H7_64_GT	1	7	1
132	H7_64_GT	1	7	2
133	H7_65_GT	1	7	1
134	H7_65_GT	1	7	2
135	H7_66_GT	1	7	1
136	H7_66_GT	1	7	2
137	H7_67_GT	1	7	1
138	H7_67_GT	1	7	2
139	H8_68_GT	1	8	1
140	H8_68_GT	1	8	2
141	H8_69_GT	1	8	1
142	H8_69_GT	1	8	2
143	H8_70_GT	1	8	1
144	H8_70_GT	1	8	2
145	H8_71_GT	1	8	1
146	H8_71_GT	1	8	2
147	H8_72_GT	1	8	1
148	H8_72_GT	1	8	2
149	H8_73_GT	1	8	1
150	H8_73_GT	1	8	2
151	H8_74_GT	1	8	1
152	H8_74_GT	1	8	2
153	H8_75_GT	1	8	1
154	H8_75_GT	1	8	2
155	H8_76_GT	1	8	1
156	H8_76_GT	1	8	2
157	H8_79_GT	1	8	1
158	H8_79_GT	1	8	2
